# Supplementary material for: Plant organellar DNA polymerases are replicative and translesion DNA synthesis polymerases
Source: PubMed Central journal article supplement — Nucleic Acids Res. 2017 Aug 30;45(18):10751–63. doi: 10.1093/nar/gkx744 (PMC5737093; doi:10.1093/nar/gkx744), 2017-08-30
Supplement: gkx744_supp.pdf [file gkx744_supp.pdf]

## Supplementary material

**Fig. S1 Amino acid sequence alignment of the exonuclease domain of AtPolls versus KF-DNAP I.** The conserved exonuclease motifs I, II, and II are underlined. Amino acid involved in the two-metal ion metal ion mechanism for exonucleolysis in KF-DNAP I are indicated by an arrow.

**Fig. S2 Amino acid sequence alignment of the polymerase domain of AtPolls versus –DNAPs I from *E. coli*, *T. aquaticus*, and *G. stearothermophilus*.** The subdomain organization is indicated by color arrows as follow: thumb, green; palm, brown; and fingers, purple. The three unique amino acid insertions in AtPolls are indicated by blue, red and yellow boxes respectively.

**Fig. S3 Amino acid sequence alignment of the polymerase domain of representative POPs from plants, protists and algae in comparison to KF-DNAP I.** Three insertion are indicated by a black line.

**Fig. S4 Deletion of the disorder region in AtPolls increase protein purification yields with out altering polymerization, exonuclease and TLS activities** A) SDS-PAGE gel showing purified AtPolls result of the removal of the N-terminal disorder region (residues 31 to 257). These constructs resemble the Klenow fragment of *E. coli* DNAP I and are dubbed KF-AtPolls B) **Comparison between polymerization and exonuclease activities of full-length and KF-AtPolls.** Time course reaction from 15 to 60 sec showing the exonuclease (lanes 1 to 12) and the polymerase (lanes 13 to 24) activity of AtPolls in comparison to KF-AtPolls. Exonucleolysis started by the addition of 2mM MgCl<sub>2</sub>, whereas primer extension started by addition of 2mM MgCl<sub>2</sub> and 50 μM of each dNTP. C) Primer extension reactions by by full-length and KF-AtPolls on a primer-template contain an AP site (tetrahydrofuran) in the templating position located immediately after the 3'-OH end of the primer. Time points were taken at 5, 10, 20, 40 and 80 sec after the addition of MgCl<sub>2</sub> Both full-length and Klenow fragment AtPolls bypass an AP site (lanes 1 to 20) The migration of the 19-mer primer and full length extension 28-mer product are labeled.

**Fig. S6 SDS-PAGE showing the purification of KF AtPolIB deletions.** 10%SDS-PAGE gel showing the purification of KF-AtPolIB deletions with molecular weight between 85 to 95 KDa.

**Fig. S7 Amino acid sequence alignment of the polymerase domain of AtPolIs in comparison to POLQ.** Three insertions in POLQ and AtPolIs are indicated by a red and green line respectively.

**Table S1 Oligonucleotides used in this study**

**Fig S1**

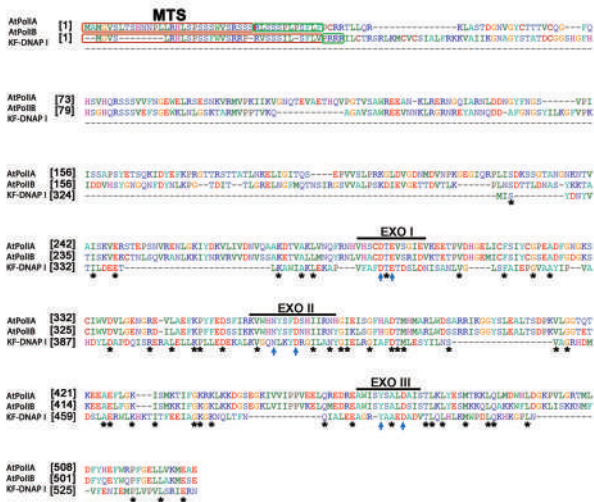

Insert 1

**Insert 2**

## Palm

## Fingers

**Insert 3**

## Palm



**Fig. S4**

**A**

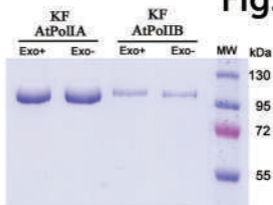

**B**

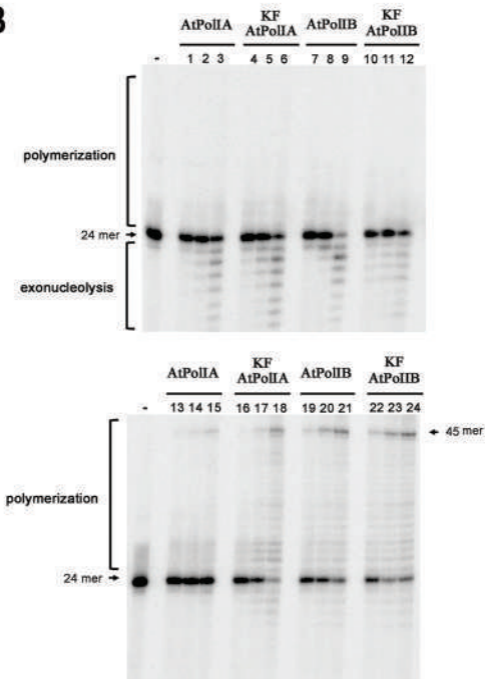

**C**

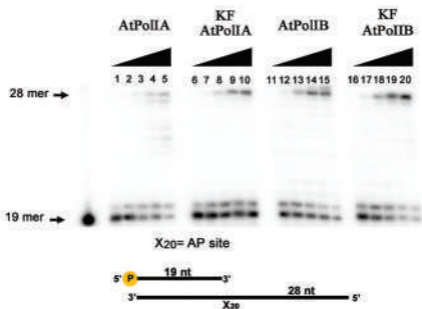

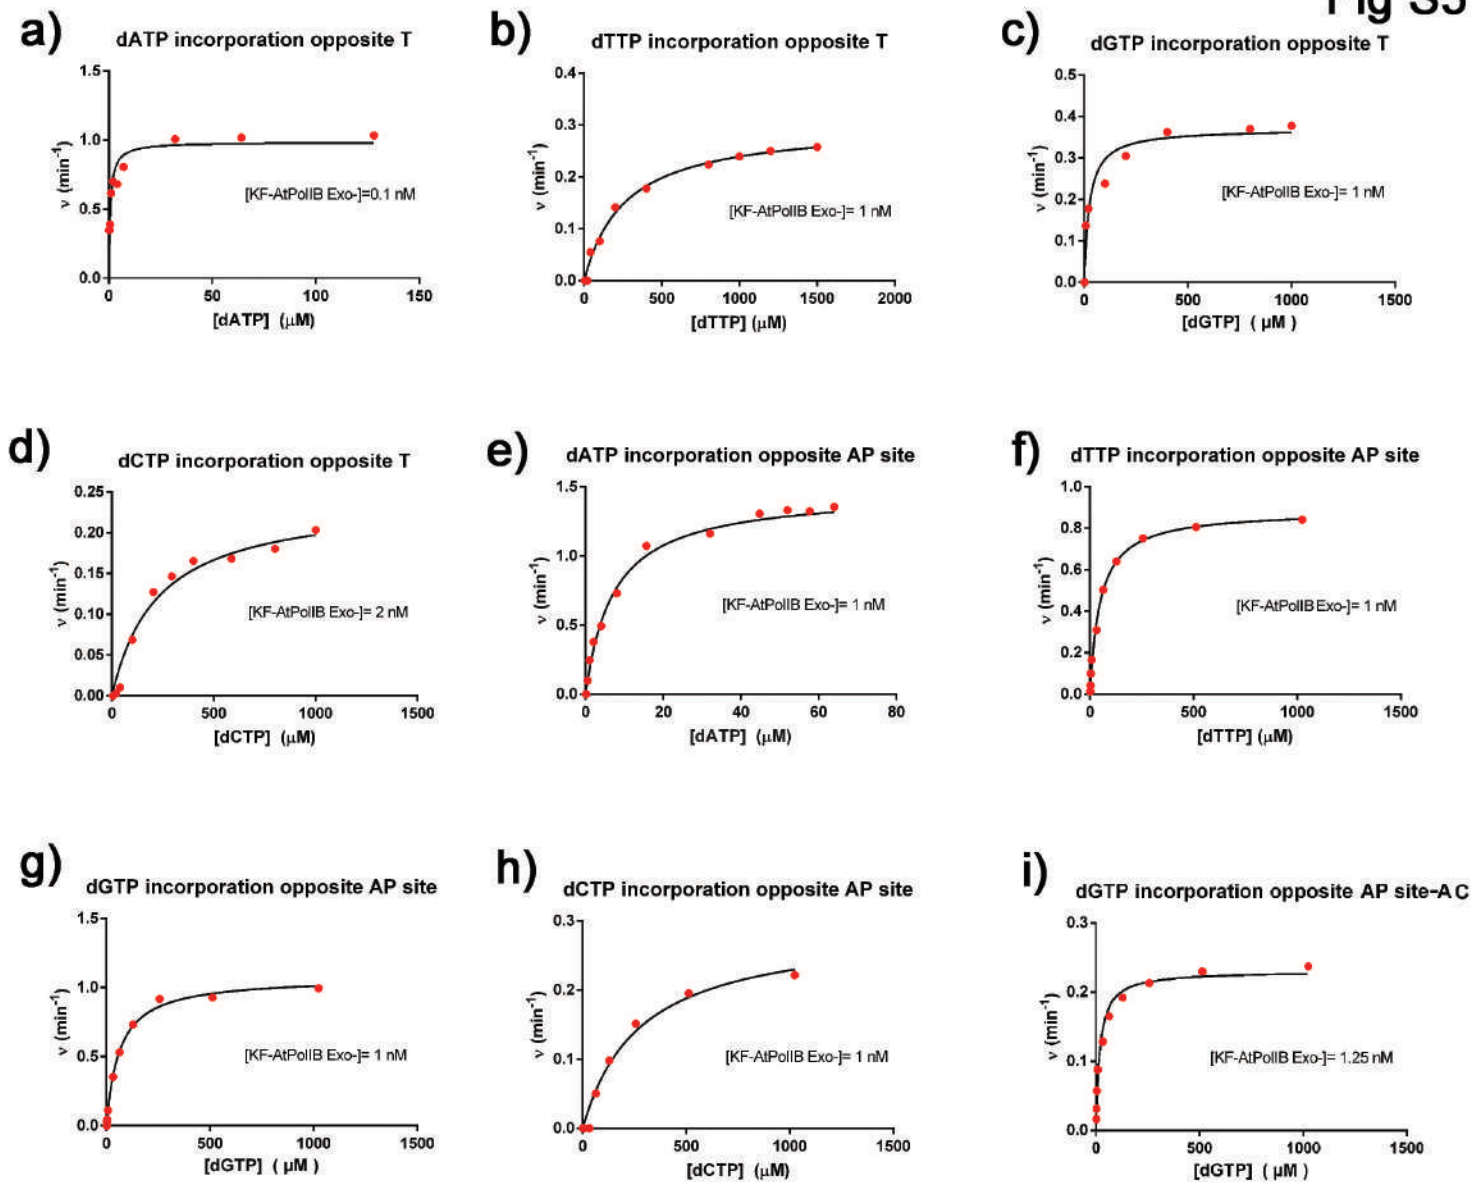

**Fig S6**

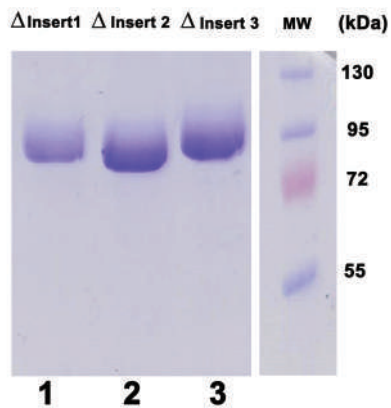

Fig S7

|          |        |                                                                                                |  |
|----------|--------|------------------------------------------------------------------------------------------------|--|
|          |        | Insert 1 POP                                                                                   |  |
| AtPolIIA | [528]  | GILVDRVILARIETKVAQAFQVQAGSRFRNMAASKYCPDAKYMNIGSDTQLRQLFFGGISNSH--DEVLPVEKLFKVPVNIQVRIEGRKRTPTK |  |
| AtPolIIB | [521]  | GMLVDRDYLAQIEIVAKAEQIAVSFRFNMAASKCPDAKMNIVGSDTQLRQLFFGGISNSCNDLPEYKLFKVPVNVKVIIEGKRRATK        |  |
| HsPolIQ  | [2108] | -----AKLDAIETQA-----YQLAGHSFSTSSDDIAEVLELK-LKLPFVNEENHQGSKRTLGS                                |  |
|          |        | Insert 1 PolIQ                                                                                 |  |
| AtPolIIA | [617]  | FRNKLARIISDEPLSTENSTASQNPVSQGVVLKELAKVSAEYDYNQGVSDISLEVVLEDD--VFETQKSKTDCETDSAYOTA             |  |
| AtPolIIB | [611]  | FRNKLARIISDRPLPTEKFTTASQNPVSQGVTLKALAKVSAEYDYNQGVLTQCLEENIQDDCISLPQSVETQVNTVSVESDTSAYOTA       |  |
| HsPolIQ  | [2161] | TR----RGIDN--GRKLRLGRQFSTSKDVLNKLK-----A                                                       |  |
|          |        | Insert 2 POP                                                                                   |  |
| AtPolIIA | [702]  | YVAFGGGRCKEACHAIALCEVCSDISLISNFILPLQCS---NVSGKDGVRVHCSLINTETGRLSARRPNLQNQP-----                |  |
| AtPolIIB | [701]  | FDAPGGGSGKKAACHAIALCEVCSDISLISNFILPLQCS---NVSGKDGVRVHCSLINTETGRLSARRPNLQNQP-----               |  |
| HsPolIQ  | [2190] | LHPLPG-----LILENRRITNATIKVVFPLGRKCLANPFLGMRITYPVSGSHATGRITFTPEINQVNPVDFTEIKMPTLVGES            |  |
|          |        | Insert 2 PolIQ                                                                                 |  |
| AtPolIIA | [774]  | ---ALEK-----DR---YKIRKAFVASPONTLVADYQGLELRILARLTCCKSMKEAFKAGGD                                 |  |
| AtPolIIB | [773]  | ---ALEK-----DR---YKIRQAFIASPONSILVADYQGLELRILARLASCCKMKEAFIAGGD                                |  |
| HsPolIQ  | [2268] | PPSQAVQKGLLPMRUKYKGFVSVNPRCAQMEERAADRMPFSISMRHAFVFPFGSILAADYSQGLELRILARLSDRLTQVLATGAD          |  |
|          |        | Insert 3 POP                                                                                   |  |
| AtPolIIA | [827]  | FHSRTAMNMYPHVREAVENGQVILENHPEQGEKPPVPLKDAFSGERRKAKMLNHSIAYGKTAVLSRDARKVSTKEAQETVDLWYNDRQ       |  |
| AtPolIIB | [826]  | FHSRTAMNMYPHIREAVENGQVILENHPPQGEKPPVPLKDAFASERRKAKMLNHSIAYGKTAVLSRDARKVSRKAQETVNLWYNDRQ        |  |
| HsPolIQ  | [2358] | VFRSIAMENKMIPEPSVG-----DQLAQAKQICYGIIYGMKSLDQGMKENDAAACYDSFQRSYT                               |  |
|          |        | Insert 4 POP                                                                                   |  |
| AtPolIIA | [917]  | EVNRWQENMRKKAIEDQVYVLTLLGRSRFPASKSR--AQGNHIGRAAINTPVQGSAAADVAMCAMEI-----SINQQLEKL--            |  |
| AtPolIIB | [916]  | EVNRWQELNRKKAIQGYVLTLLGRARFPFYRSR--AQGNHIGRAAINTPVQGSAAADVAMCAMEI-----SNQRLKEI--               |  |
| HsPolIQ  | [2422] | GINQFNTETVKNKRDGFVQTILRRRVLPQIKDNNPYRKAHAERQAINITVQGSAAIDVKIATVNIQQLFTFTSTFKSHGUREQLQGS        |  |
|          |        | Insert 4 PolIQ                                                                                 |  |
| AtPolIIA | [990]  | -----GKRLLLQIIDEVILEGPIESAEIAKDIVVQMSKPFNGKRLHSVDSVDAKCAQNNYAAK-----[1050]                     |  |
| AtPolIIB | [989]  | -----GKRLLLQIIDEVILEGPIESAEIAKDIVVQMSKPFNGKRLHSVDSVDAKCAQNNYAGK-----[1049]                     |  |
| HsPolIQ  | [2512] | DQTVLSRKKQLQGMCPIRGGFFILQLDELLYEAEEDVVVQVQIVKNGMES----AVKLSVKLKVIVKVGASWGELKDFDV[2590]         |  |

## Table S1 Oligonucleotides used in this study

### A Primers used for subcloning

|                |                                             |
|----------------|---------------------------------------------|
| A1- N terminal | 5'-GGGAAGGGCATATGAGGCTTAGCTCTAGTCCATTACC-3' |
| A1- C terminal | 5'-GGAGGAGGGATCCTTATTTAGCTGCATACCAATT-3'    |
| B1- N terminal | 5'-GGGAAGGGCATATGCCACGCCGTCGTATCCTGTGTAC-3' |
| B1- C terminal | 5'-GGGAAGGG GGATCCTTATTTGCCCCGCATACC-3'     |

### B Primers used for Site Directed mutagenesis

|         |                                                                  |
|---------|------------------------------------------------------------------|
| mutA3-F | 5'-GGGAAGGGCATATGCTCGGGAAAATCTATGATAAA-3'                        |
| mutA3-R | 5'-GGAGGAGGGATCCTTATTTAGCTGCATACCAATT-3'                         |
| mutB3-F | 5'-GGGAAGGGCATATGCTGAAGAAAATCTACAATCGCGTTC<br>GTGTTGTGGATAATG-3' |
| mutB3-R | 5'-GGGAAGGG GGATCCTTATTTGCCCCGCATACC-3'                          |
| AExo-F  | 5'-GGCAGTGAGCGGCATCGAAGTT-3'                                     |
| AExo-R  | 5'-GTAGCGCAAGAATGCACATGATT-3'                                    |
| BExo-F  | 5'-GGCAGTGTCACGCATCGATGTTAAAC-3'                                 |
| BExo-R  | 5'-GTTGCGCAAGCATGAACCAAGTTAC-3'                                  |

### C Primers used in DNA polymerization assays

|                   |                                                                                                 |
|-------------------|-------------------------------------------------------------------------------------------------|
| Assay             | Polymerase and exonuclease                                                                      |
| oligo 24 labeled  | 5' CGC AGC CCA CCT GCC CAC CTA ACT 3'                                                           |
| oligo 45          | 5' CCT TGG CAC TAG CGC AGG GCC AGT TAG GTG GGC AGG TGG GCT GCG 3'                               |
|                   | Strand-displacement                                                                             |
| oligo 24 labeled  | 5' CGC AGC CCA CCT GCC CAC CTA ACT 3'                                                           |
| oligo 65          | 5' CCT TGG CAC TAG CGC ACG ATG CCG CTA AGA ACC TCA GGG CCA GTT<br>AGG TGG GCA GGT GGG CTG CG 3' |
| oligo 15 blocking | 5' CGC AGC CCA CCT GCC 3'                                                                       |
|                   | Abasic site extension                                                                           |
| Oligo 21 labeled  | 5'CGA AGTACT AGT AAC GAC CCT 3'                                                                 |
| Positive control  | 5' ATA TAG GGT ACC GAC TGA AGC ACT GGA CGC CGT AAG TCA GGG TCG<br>TTA CTA GTA CTT CG 3'         |

|                  |                                                                                                   |
|------------------|---------------------------------------------------------------------------------------------------|
| Abasic fidelity  | 5' ATA TAG GGT ACC GAC TGA AGC ACT GGA CGC CG [abasic site] AAG TCA GGG TCG TTA CTA GTA CTT CG 3' |
|                  | <b>Nucleotide insertion opposite canonical an abasic site and Steady-state kinetics</b>           |
| Oligo 24 labeled | 5' CGC AGC CCA CCT GCC CAC CTA ACT 3'                                                             |
| FideA            | 5' CCT TGG CAC TAG CGC AGG GCA AGT TAG GTG GGC AGG TGG GCT GCG 3'                                 |
| FideT            | 5' CCT TGG CAC TAG CGC AGG GCT AGT TAG GTG GGC AGG TGG GCT GCG 3'                                 |
| FideG            | 5' CCT TGG CAC TAG CGC AGG GCG AGT TAG GTG GGC AGG TGG GCT GCG 3'                                 |
| FideC            | 5' CCT TGG CAC TAG CGC AGG GGC AGT TAG GTG GGC AGG TGG GCT GCG 3'                                 |
| Oligo 19 labeled | 5' TGT TAG CAG ACA AGC CGA T 3'                                                                   |
| Abasic 28        | 5' AAG AGT AC [ abasic site] ATC GGC TTG TCT GCT AAC A 3'                                         |
| Long_8A labeled  | 5' CGC AGC GGA CCT GCC CAC CTA ACT GAT ATA 3'                                                     |
| Abasic45         | 5' CCT TGG CAC TAG CGC [abasic site]AT ATC AGT TAG GTG GGC AGG TCC GCT GCG 3'                     |
|                  | Non-damaged and damaged template extension by deletions                                           |
| Long8 labeled    | 5' CGC AGC GGA CCT GCC CAC CTA ACT GAT AT 3'                                                      |
| C45              | 5' CCT TGG CAC TAG CGC TAT ATC AGT TAG GTG GGC AGG TCC GCT GCG 3'                                 |
| Long_8A labeled  | 5' CGC AGC GGA CCT GCC CAC CTA ACT GAT ATA 3'                                                     |
| Abasic45         | 5' CCT TGG CAC TAG CGC [abasic site]AT ATC AGT TAG GTG GGC AGG TCC GCT GCG 3'                     |
